# Supplementary material for: Rapid Detection of Genotype II African Swine Fever Virus Using CRISPR Cas13a-Based Lateral Flow Strip
Source: MDPI journal article supplement (doi:10.3390/v14020179), 2022-01-18
Supplement: s1 [file s1]

The detailed sequence of the p72 (GenBank:MK333180.1) fragment used in this study is supplemented as follows.

ATGGCATCAGGAGGAGCTTTTTGTCTTATTGCTAACGATGGGAAGGCCGACAAGATTATA  
TTGGCCCAAGACTTGCTGAATAGCAGGATCTCTAACATTA AAAATGTGAACAAAAGTTAT  
GGGAAACCCGATCCCGAACCCACTTTGAGTCAAATCGAAGAAACACATTTGGTGCAATTT  
AATGCGCATTTTAAGCCTTATGTTCCAGTAGGGTTTGAATACAATAAAGTACGCCCCGAT  
ACGGGTACCCCCACCTTGGGAAACAAGCTTACCTTTGGTATTCCCCAGTACGGAGACTTT  
TTCCATGATATGGTGGGCCATCATATATTGGGTGCATGTCATTCATCCTGGCAGGATGCT  
CCGATTCAGGGCACGTCCCAGATGGGGGCCCATGGGCAGCTTCAAACGTTTCCTCGCAAC  
GGATATGACTGGGACAACCAAACACCCTTAGAGGGCGCCGTTTACACGCTTGTAGATCCT  
TTTGGAAGACCCATTGTACCCGGCACAAGAATGCGTACCGAAACTTGGTTTACTACTGC  
GAATACCCCGGAGAACGACTTTATGAAAACGTAAGATTGATGTAAATGGAAATTCCTTA  
GACGAATATAGTTCGGATGTCACAACGCTTGTGCGCAAATTTTGCATCCCAGGGGATAAA  
ATGACTGGATATAAGCACTTGGTTGGCCAGGAGGTATCGGTGGAGGGAACCAAGTGGCCCT  
CTCCTATGCAACATTCATGATTTGCACAAGCCGCACCAAAGCAAACCTATTCTTACCGAT  
GAAAATGATACGCAGCGAACGTGTAGCCATACCAACCCGAAATTTCTTTCACAGCATTTT  
CCCGAGAACTCTCACAATATCCAAACAGCAGGTAAACAAGATATTACTCCTATCACGGAC  
GCAACGTATCTGGACATAAGACGTAATGTTTATTACAGCTGTAATGGACCTCAAACCCCT  
AAATACTATCAGCCCCCTCTTGCCTCTGGATTAAGTTGCGCTTTTGGTTTAATGAGAAC  
GTGAACCTTGCTATTCCCTCAGTATCCATTCCCTTCGGCGAGCGCTTTATCACCATAAAG  
CTTGATCGCAAAAGGATTTGGTGAATGAATTTCTGGACTTTTTGTACGCCAGTCACGT  
TTTATAGCTGGACGCCCCAGTAGACGCAATATACGCTTTAAACCATGGTTTATCCCAGGA  
GTCATTAATGAAATCTCGCTCACGAATAATGAACTTTACATCAATAACCTGTTTGTAACC  
CCTGAAATACACAACCTTTTTGTAAAACGCGTTCGCTTTTCGCTGATACGTGTCCATAAA  
ACGCAGGTGACCCACACCAACAATAACCACCACGATGAAAACTAATGTCTGCTCTTAAA  
TGGCCCATTGAATATATGTTTATAGGATTA AAACCTACCTGGAACATCTCCGATCAAAT  
CCTCATCAACACCGAGATTGGCACAAGTTCGGACATGTTGTTAACGCCATTATGCAGCCC  
ACTCACCACGCAGAGATAAGCTTTCAGGATAGAGATACAGCTCTTCAGACGCATGTTCA  
TCTATATCTGATATTAGCCCCGTTACGTATCCGATCACATTACCTATTATTA AAAACATT

TCCGTAAGTGCATGGTATCAATCTTATCGATAAATTTCCATCAAAGTTCTGCAGCTCT  
TACATACCCTTCCACTACGGAGGCAATGCGATTAAAACCCCGATGATCCGGGTGCGATG  
ATGATTACCTTTGCTTTGAAGCCACGGGAGGAATACCAACCCAGTGGTCATATTAACGTA  
TCCAGAGCAAGAGAATTTTATATTAGTTGGGACACGGATTACGTGGGGTCTATCACTACG  
GCTGATCTTGTGGTATCGGCATCTGCTATTAACCTTCTTCTTCAGAACGGTTCAGCT  
GTGCTGCGTTACAGTACCTAA
